# Supplementary material for: Influence of two supervised physical exercise programs on quality of life and depressive symptomatology: comparative analysis in three companies with sedentary occupations
Source: Research Square preprint supplement (doi:10.21203/rs.3.rs-1737283/v1), 2022-06-16
Supplement: Supplementary file 1 [file 35a67fd80674ee794ab89f2a.docx]

**Table 2.**  Mean (M) and Standard Deviation (SD) before (Pre) and after the intervention (Post) the PRODET® program for the SF-36 and CES-D calendars of companies engaged in (1) renewable energy engineering and (2) insurance

|  | **(1) Renewable energy engineering company (n=23)** | | | | | | | | | | | | | | | | | | | | |  | |  | |  | |  | **(2) Insurance company (n=14)** | | | | | | | |
| --- | --- | --- | --- | --- | --- | --- | --- | --- | --- | --- | --- | --- | --- | --- | --- | --- | --- | --- | --- | --- | --- | --- | --- | --- | --- | --- | --- | --- | --- | --- | --- | --- | --- | --- | --- | --- |
|  | **Headquarters 1 (Madrid)** | | | |  |  |  |  | **Headquarters 2 (Navarra)** | | | |  |  |  |  | **Headquarters 3 (Basque Country)** | | | |  | |  | |  | |  | | **Single headquarters (Madrid)** | | | | | | | |
|  | **Pre** | | **Post** | |  |  |  |  | **Pre** | | **Post** | |  |  |  |  | **Pre** | | **Post** | |  | |  | |  | |  | | **Pre** | | **Post** | |  |  |  |  |
|  | **M** | **DE** | **M** | **DE** | **N** | **Z** | **p** | **η2** | **M** | **DE** | **M** | **DE** | **N** | **Z** | **p** | **η2** | **M** | **DE** | **M** | **DE** | **N** | | **Z** | | **p** | | **η2** | | **M** | **DE** | **M** | **DE** | **N** | **Z** | **p** | **η2** |
| **Quality of life (SF-36 v.2)** | |  |  |  |  |  |  |  |  |  |  |  |  |  |  |  |  |  |  |  |  |  | |  | |  | |  | |  |  |  |  |  |  |  |  |
| SF-36 Physical Role (0-100) | | 88.07 | 13.24 | 88.07 | 23.13 | 11 | 0.42 | 0.338 |  | 91.25 | 12.18 | 88.75 | 21.83 | 5 | 0.00 | 0.393 |  | 96.43 | 4.92 | 97.32 | 7.09 | 7 | | 0.27 | | 0.500 | |  | | 89.29 | 17.75 | 94.64 | 9.13 | 14 | 1.21 | 0.113 |  |
| SF-36 Body Pain (0-100) | | 75.18 | 13.75 | 82.09 | 13.38 | 11 | 1.97 | **0.024*** | **0.18** | 73.60 | 17.73 | 74.60 | 26.09 | 5 | 0.14 | 0.051 |  | 87.71 | 13.88 | 95.43 | 7.81 | 7 | | 1.63 | | 0.446 | |  | | 75.29 | 16.57 | 77.36 | 13.89 | 14 | 0.83 | 0.203 |  |
| SF-36 General Health (0-100) | | 74.64 | 14.90 | 80.00 | 8.66 | 11 | 1.36 | 0.086 |  | 77.00 | 16.58 | 92.00 | 3.54 | 5 | 1.83 | 0.069 |  | 82.14 | 19.03 | 91.57 | 15.97 | 7 | | 1.48 | | **0.034** | | **0.33*** | | 78.00 | 15.68 | 87.07 | 10.79 | 14 | 2.97 | **0.001**** | **0.32** |
| SF-36 Vitality (0-100) | | 60.00 | 11.40 | 64.55 | 13.68 | 11 | 1.56 | 0.060 |  | 66.00 | 15.57 | 79.00 | 7.42 | 5 | 1.84 | 0.055 |  | 63.57 | 18.42 | 70.71 | 11.34 | 7 | | 1.59 | | 0.033 | |  | | 61.07 | 13.47 | 71.07 | 11.96 | 14 | 2.90 | **0.002*** | **0.30** |
| SF-36 Social Function (0-100) | | 94.32 | 6.53 | 89.77 | 22.93 | 11 | 0.00 | 0.500 |  | 92.50 | 6.85 | 95.00 | 11.18 | 5 | 0.38 | 0.079 |  | 96.43 | 6.10 | 100.00 | 0.00 | 7 | | 1.41 | | 0.353 | |  | | 91.07 | 14.23 | 100.00 | 0.00 | 14 | 2.04 | **0.021*** | **0.15** |
| SF-36 Emotional Role (0-100) | | 90.91 | 12.61 | 96.97 | 7.70 | 11 | 1.27 | 0.103 |  | 85.00 | 18.07 | 100.00 | 0.00 | 5 | 1.60 | 0.159 |  | 95.24 | 12.60 | 100.00 | 0.00 | 7 | | 1.00 | | 0.054 | |  | | 93.45 | 13.55 | 98.21 | 4.82 | 14 | 1.29 | 0.099 |  |
| SF-36 Mental Health (0-100) | | 72.73 | 10.09 | 74.18 | 5.76 | 11 | 0.60 | 0.273 |  | 76.80 | 6.57 | 79.20 | 6.57 | 5 | 1.34 | 0.458 |  | 75.43 | 13.55 | 79.43 | 6.70 | 7 | | 0.11 | | 0.090 | |  | | 71.71 | 12.40 | 76.57 | 10.51 | 14 | 1.97 | **0.024*** | **0.14** |
| SF-36 Physical Function (0-100) | | 89.09 | 9.44 | 90.45 | 17.10 | 11 | 1.13 | 0.129 |  | 100.00 | 0.00 | 96.89 | 4.54 | 5 | 1.34 | 0.079 |  | 97.86 | 2.67 | 99.29 | 1.89 | 7 | | 1.41 | | 0.090 | |  | | 94.80 | 8.63 | 96.79 | 6.96 | 14 | 1.36 | 0.088 |  |
| Global Physical Health | | 51.44 | 4.84 | 52.55 | 5.43 | 11 | 1.33 | 0.091 |  | 53.80 | 3.92 | 53.88 | 6.53 | 5 | 0.41 | **0.009*** | **0.40** | 55.68 | 4.74 | 57.49 | 3.63 | 7 | | 2.37 | | 0.343 | |  | | 52.88 | 5.13 | 54.55 | 3.80 | 14 | 1.66 | **0.048*** | **0.10** |
| Global Mental Health | | 49.38 | 5.13 | 50.11 | 3.29 | 11 | 0.80 | 0.212 |  | 48.74 | 4.92 | 53.48 | 2.38 | 5 | 2.02 | 0.306 |  | 49.45 | 8.03 | 51.68 | 2.57 | 7 | | 0.51 | | **0.022** | | **0.41*** | | 48.58 | 5.51 | 52.00 | 4.17 | 14 | 2.35 | **0.009**** | **0.20** |
| **Depression (CES-D)** | |  |  |  |  |  |  |  |  |  |  |  |  |  |  |  |  |  |  |  |  |  | |  | |  | |  | |  |  |  |  |  |  |  |  |
| Depressive Affect | | 3.00 | 3.10 | 1.45 | 2.62 | 11 | -2.21 | **0.013*** | **0.22** | 1.20 | 1.64 | 1.00 | 1.41 | 5 | -0.27 | 0.393 |  | 1.17 | 2.04 | 0.17 | 0.41 | 6 | | -1.34 | | 0.090 | |  | | 2.58 | 3.70 | 1.67 | 2.87 | 12 | -1.71 | **0.044*** | **0.12** |
| Positive Affect | | 3.09 | 3.11 | 1.45 | 2.62 | 11 | -2.24 | **0.013*** | **0.23** | 1.80 | 2.49 | 0.80 | 1.10 | 5 | -1.07 | 0.143 |  | 0.83 | 1.60 | 0.33 | 0.82 | 6 | | -1.34 | | 0.090 | |  | | 2.83 | 3.54 | 1.67 | 2.61 | 12 | -2.03 | **0.021*** | **0.17** |
| Psychomotor Decline | | 4.09 | 4.48 | 1.82 | 1.99 | 11 | -2.21 | **0.014*** | **0.22** | 3.40 | 3.85 | 1.60 | 1.14 | 5 | -1.34 | 0.090 |  | 1.50 | 2.74 | 1.33 | 1.86 | 6 | | -0.33 | | 0.369 | |  | | 3.25 | 3.72 | 1.33 | 2.10 | 12 | -2.39 | **0.008**** | **0.24** |
| Interpersonal Difficulties | | 0.91 | 1.38 | 1.00 | 1.26 | 11 | -0.41 | 0.342 |  | 0.60 | 0.89 | 0.60 | 0.89 | 5 | 0.00 | 0.500 |  | 0.00 | 0.00 | 0.00 | 0.00 | 6 | |  | |  | |  | | 0.42 | 0.51 | 0.42 | 1.00 | 12 | -0.33 | 0.369 |  |
| Total Score | | 12.73 | 9.67 | 6.45 | 5.77 | 11 | -2.49 | **0.006**** | **0.28** | 6.80 | 7.40 | 4.00 | 3.81 | 5 | -1.60 | 0.054 |  | 4.83 | 7.31 | 2.00 | 3.03 | 6 | | -1.16 | | 0.123 | |  | | 2.58 | 3.70 | 1.67 | 2.87 | 12 | -1.71 | **0.044*** | **0.12** |

***Note:*** M= mean; SD= standard deviation; Z= z-score Wilcoxon; * P <0.05; **. P <0.01; P <0.001. η2 presented according to Cohen's proposal: <0.06 small. ≥0.06 to <0.14 medium and ≥0.14 large (Cohen. 1988).
